# Supplementary material for: Age-Related Changes in Para and Wheelchair Racing Athlete’s Performances
Source: Front Physiol. 2019 Mar 19;10:256. doi: 10.3389/fphys.2019.00256 (PMC6436002; doi:10.3389/fphys.2019.00256)
Supplement: TABLE S1 — Coefficients values, fitting indicators and age at the peak performance for all track and field events. [file Table_1.xlsx]

## Sheet: Males
	Coefficient values								Fitting indicators		Peak performance
Event	a		b		c		d		R²	RMSE	Estimated Age (years)	Absolute best Age	Absolute Best Performance %WR able-bodied	Range < 3% of the best performance	Range < 2% of the best performance
100m PA	126.3	(101, 151.6)	-0.1046	(-0.1351, -0.07408)	9877	(-7.531e+05, 7.729e+05)	0.0001084	(-0.008195, 0.008411)	0.9862	4.1527	24	25	93.5547	[21-29]	[25-27]
100m WCA	107	(71.41, 142.7)	-0.07642	(-0.1028, -0.05009)	5698	(-4.248e+05, 4.362e+05)	0.0001558	(-0.01146, 0.01177)	0.9799	3.5043	29	29	70.2861	[22-36]	[25-34]
200m PA	124.5	(93.03, 155.9)	-0.1085	(-0.1502, -0.06679)	2,123x10^4	(-4.359e+06, 4.401e+06)	5,085x10^-5	(-0.0104, 0.0105)	0.9754	5.5082	23.2741	25	91.1639	[17-30]	[17-30]
200m WCA	121.4	(77.57, 165.2)	-0.07586	(-0.104, -0.04775)	1,122x10^4	(-1.511e+06, 1.534e+06)	9,147x10^-5	(-0.01222, 0.0124)	0.977	4.2283	28.885	34	79.232	[21-38]	[22-37]
400m PA	122.1	(95.89, 148.2)	-0.1297	(-0.1867, -0.07269)	1,041x10^4	(-9.722e+05, 9.93e+05)	0.0001017	(-0.009422, 0.009626)	0.9789	5.4406	20.8434	25	94.8006	[17-30]	[18-30]
400m WCA	150.1	(79.93, 220.3)	-0.07059	(-0.1027, -0.03851)	1,052x10^4	(-1.314e+06, 1.335e+06)	0.0001207	(-0.01492, 0.01516)	0.96	6.1316	30.006	27	95.0939	[21-37]	[21-37]
800 m PA	124.1	(101, 147.1)	-0.1101	(-0.1428, -0.07736)	1,985x10^4	(-2.938e+06, 2.978e+06)	5,313x10^-5	(-0.007832, 0.007938)	0.9905	3.7735	23.2546	25	91.7197	[18-37]	[21-29]
800m WCA	178.5	(109.4, 247.6)	-0.06551	(-0.08913, -0.04188)	2404	(-5.104e+04, 5.585e+04)	0.000587	(-0.0118, 0.01298)	0.9676	5.6275	31.9927	24	110.744	[19-40]	[19-37]
1500m PA	129	(99.51, 158.5)	-0.09767	(-0.1292, -0.06609)	1,108x10^4	(-9.883e+05, 1.01e+06)	9,964x10^-5	(-0.008814, 0.009014)	0.9854	4.3922	24.9035	29	90.9452	[18-43]	[18-43]
1500m WCA	198.4	(105.6, 291.2)	-0.06202	(-0.08781, -0.03624)	4325	(-1.673e+05, 1.76e+05)	0.0003691	(-0.0138, 0.01453)	0.9598	6.8171	32.7314	37	119.879	[19-40]	[24-40]
5000m PA	129	(101.5, 156.4)	-0.08916	(-0.1144, -0.06392)	1,266x10^4	(-1.189e+06, 1.214e+06)	8,434x10^-5	(-0.007865, 0.008033)	0.9926	3.1442	26.6338	31	90.8355	[21-43]	[21-31]
5000m WCA	157.9	(142.7, 173.1)	-0.09348	(-0.1099, -0.07701)	43.63	(0.2593, 86.99)	0.0156	(0.0067, 0.01842)	0.9928	3.7057	31.0608	30	128.578	[19-47]	[19-45]
10000m PA	128.2	(84.47, 172)	-0.07338	(-0.1011, -0.0456)	5617	(-3.363e+05, 3.476e+05)	0.0001866	(-0.01099, 0.01136)	0.9914	3.259	29.8355	32	88.6826	[28-36]	[32-32]
10000m WCA	173.2	(78.25, 268.2)	-0.08142	(-0.1377, -0.02514)	147.5	(-787.8, 1083)	0.006359	(-0.01932, 0.03204)	0.9864	7.2219	30.8772	31	133.119	[19-45]	[19-45]
Marathon PA	141.1	(62.36, 219.9)	-0.05946	(-0.08937, -0.02956)	9512	(-1.194e+06, 1.213e+06)	0.0001231	(-0.01527, 0.01552)	0.9862	3.7342	33.0498	34	86.8598	[27-38]	[32-38]
Marathon WCA	217.8	(162.2, 273.3)	-0.06508	(-0.08365, -0.04651)	131.1	(-170.8, 432.9)	0.008021	(-0.002508, 0.01855)	0.9935	4.7409	35.5851	31	157.494	[28-51]	[28-51]
Discus PA	122.1	(15.13, 229.1)	-0.07068	(-0.134, -0.007382)	8579	(-1.719e+06, 1.736e+06)	0.0001292	(-0.02558, 0.02584)	0.8538	9.5546	28.9875	41	86.5416	[23-42]	[23-41]
Discus WCA	102.7	(16.67, 188.7)	-0.06407	(-0.1155, -0.01263)	9351	(-1.996e+06, 2.014e+06)	0.0001033	(-0.02185, 0.02205)	0.7236	7.331	29.8889	21	66.1852	[21-32]	[21-21]
Javelin PA	88.18	(48.67, 127.7)	-0.09751	(-0.1601, -0.03489)	2,465x10^-4	(-1.198e+07, 1.203e+07)	3,306x10^5	(-0.01602, 0.01608)	0.9283	6.1485	24.1536	26	66.7547	[25-35]	[25-26]
Javelin WCA	72.37	(4.035, 140.7)	-0.06994	(-0.1366, -0.003231)	9325	(-3.438e+06, 3.457e+06)	7,267x10^-5	(-0.02662, 0.02676)	0.8401	5.9407	28.7197	22	51.7669	[22-23]	[22-23]
Shot put PA	115.7	(28.99, 202.5)	-0.06982	(-0.1208, -0.01883)	1,919x10^4	(-7.959e+06, 7.997e+06)	5,417x10^-5	(-0.02236, 0.02246)	0.9206	7.1118	29.3485	24	86.9377	[24-24]	[24-24]
Shot put WCA	107.8	(14.93, 200.6)	-0.06077	(-0.1085, -0.013)	7693	(-1.353e+06, 1.368e+06)	0.000128	(-0.02224, 0.0225)	0.7834	7.0873	31.1183	38	70.8045	[36-39]	[36-39]
High Jump PA	118.9	(42.84, 195)	-0.0898	(-0.1569, -0.02273)	7977	(-1.505e+06, 1.52e+06)	0.000129	(-0.02407, 0.02432)	0.972	6.2482	26.0149	28	89.3878	[24-29]	[24-29]
Long Jump PA	118.3	(62.94, 173.6)	-0.09954	(-0.1656, -0.03353)	7819	(-1.033e+06, 1.049e+06)	0.0001344	(-0.01755, 0.01782)	0.9497	7.592	24.2427	26	92.067	[26-28]	[26-27]
Triple Jump PA	109.4	(81, 137.8)	-0.112	(-0.1595, -0.06449)	1,315x10^4	(-2.168e+06, 2.194e+06)	6,6881x10^-5	(-0.01128, 0.01142)	0.9931	3.1212	23.2545	21	84.9098	[20-31]	[20-24]

## Sheet: Females
	Coefficient values								Fitting indicators		Peak performance
Event	a		b		c		d		R²	RMSE	Estimated peak-Age (years)	Absolute best Age	Absolute Best Performance %WR able-bodied	Range < 3% of best performance	Range < 2% of best performance
100m PA	125	(106.3, 143.8)	-0.1005	(-0.1204, -0.0807)	6247	(-2.379e+05, 2.504e+05)	0.0001649	(-0.006193, 0.006523)	0.9927	2.95	24.85	25	92.0175	[24-35]	[24-26]
100m WCA	90.66	(72.31, 109)	-0.1077	(-0.1418, -0.07368)	9945	(-1.089e+06, 1.109e+06)	7,708x10^-5	(-0.008389, 0.008543)	0.9813	3.36	23.6081	27	68.3388	[20-27]	[20-27]
200m PA	124	(100.7, 147.3)	-0.1017	(-0.1277, -0.07577)	1,186x10^4	(-1.071e+06, 1.095e+06)	8,722x10^-5	(-0.007818, 0.007993)	0.9892	3.67	24.56	24	92.6617	[24-32]	[24-25]
200m WCA	102.7	(74.48, 131)	-0.1085	(-0.1544, -0.06272)	8570	(-9.595e+05, 9.766e+05)	0.0001025	(-0.01139, 0.01159)	0.9756	4.75	23.39	28	75.9972	[21-41]	[21-41]
400m PA	118.3	(90.9, 145.6)	-0.1115	(-0.152, -0.07097)	1,45x10^4	(-2.162e+06, 2.191e+06)	6,78x10^-5	(-0.01005, 0.01019)	0.9902	3.85	23.28	25	91.9451	[24-32]	[25-26]
400m WCA	127.4	(95.96, 158.8)	-0.09652	(-0.1282, -0.06483)	2,116x10^10	(-4.008e+06, 4.051e+06)	5,131x10^-5	(-0.009677, 0.00978)	0.9858	4.45	25.13	26	91.7148	[23-41]	[26-27]
800 m PA	113.1	(91.14, 135.1)	-0.09999	(-0.1278, -0.07219)	588.3	(-3280, 4456)	0.001444	(-0.007026, 0.009914)	0.9935	2.94	25.52	20	82.7526	[20-37]	[20-37]
800m WCA	156.1	(111.8, 200.5)	-0.09065	(-0.1203, -0.06099)	1,006x10^4	(-8.788e+05, 8.989e+05)	0.0001294	(-0.01118, 0.01144)	0.9907	4.62	26.2854	26	110.28	[24-41]	[24-41]
1500m PA	124.9	(99.41, 150.4)	-0.08298	(-0.1031, -0.06283)	5343	(-2.079e+05, 2.186e+05)	0.0001904	(-0.007287, 0.007668)	0.9908	9.93	27.91	36	87.9977	[27-36]	[30-36]
1500m WCA	172.8	(118.7, 226.9)	-0.0827	(-0.1105, -0.05602)	6812	(-4.045e+05, 4.181e+05)	0.0002061	(-0.01202, 0.01243)	0.995	3.79	27.88	26	119.041	[21-46]	[26-26]
5000m PA	78.81	(71.97, 85.66)	-0.1856	(-0.3604, -0.01076)	3.137	(-2.397, 8.67)	0.02673	(0.01338, 0.04009)	0.9877	3.93	24.31	27	80.2593	[20-35]	[20-35]
5000m WCA	164.5	(132.3, 196.6)	-0.1063	(-0.1385, -0.07418)	172.3	(-313.6, 658.2)	0.005494	(-0.005052, 0.01604)	0.9951	4.19	26.09	23	128.495	[18-41]	[20-41]
10000m PA	-	-	-	-	-	-	-	-	-	-	-
10000m WCA	-	-	-	-	-	-	-	-	-	-	-
Marathon PA	73.64	(68.86, 78.43)	-0.3321	(-15.51, 14.85)	0.8258	(-0.8686, 2.52)	0.03689	(0.02071, 0.05308)	0.9925	3.048	18.125	37	78.6925	[37-37]	[37-37]
Marathon WCA	225.6	(69.81, 381.3)	-0.06568	(-0.1064, -0.02492)	3452	(-1.539e+05, 1.608e+05)	0.0005193	(-0.02207, 0.02311)	0.9958	4.4395	31.9031	33	153.389	[33-33]	[33-33]
Discus PA	80.44	(16.85, 144)	-0.08004	(-0.1497, -0.01038)	9684	(-3.713e+06, 3.732e+06)	7,133x10^-5	(-0.02718, 0.02732)	0.9361	5.7529	27.8639	22	61.7188	[22-22]	[22-22]
Discus WCA	80.65	(-79.88, 241.2)	-0.05009	(-0.1253, 0.02514)	1,101x10^4	(-0.1253, 0.02514)	6,809x10^-5	(-0.04371, 0.04384)	0.5464	7.9976	33.588	25	54.7526	[23-25]	[25-25]
Javelin PA	266.8	(-2780, 3313)	-0.02691	(-0.2022, 0.1484)	224.2	(-6507, 6955)	0.01143	(-0.1671, 0.19)	0.9695	4.1351	26.8699	24	61.6768	[24-24]	[24-24]
Javelin WCA	841.4	(-1.722e+05, 1.739e+05)	-0.008019	(-0.6825, 0.6665)	3259	(-2.143e+06, 2.149e+06)	0.001459	(-0.7075, 0.7104)	0.7831	5.013	36.9191	30	42.2385	[30-34]	[30-34]
Shot put PA	234	(-2130, 2598)	-0.02097	(-0.1784, 0.1365)	33.9	(-737.4, 805.2)	0.02808	(-0.1863, 0.2425)	0.9658	5.0905	33.4264	36	76.5356	[36-39]	[36-39]
Shot put WCA	2138	(-2.686e+05, 2.729e+05)	-0.003356	(-0.2857, 0.279)	619.7	(-6.4e+04, 6.524e+04)	0.00761	(-0.2925, 0.3077)	0.8708	3.9092	38.273	40	50.8175	[25-40]	[37-40]
High Jump PA	-	-	-	-	-	-	-	-	-	-	-
Long Jump PA	222.3	(-1029, 1473)	-0.04695	(-0.1895, 0.09564)	1894	(-1.98e+05, 2.018e+05)	0.001532	(-0.1445, 0.1476)	0.98	4.8135	26.4096	31	87.766	[31-32]	[31-32]
Triple Jump PA	142.8	(-840, 1126)	-0.04889	(-0.3712, 0.2735)	6.436	(-167.8, 180.7)	0.07069	(-0.451, 0.5924)	0.9943	1.9082	22.8329	25	75.4839	[25-26]	[25-26]
